# Supplementary material for: Real-world Management of Women with Postmenopausal Osteoporosis Treated with Denosumab: A Prospective Observational Study in the Czech Republic and Slovakia
Source: PubMed Central journal article supplement — Adv Ther. 2018 Sep 6;35(10):1713–28. doi: 10.1007/s12325-018-0779-9 (PMC6182647; doi:10.1007/s12325-018-0779-9), 2018-09-06

**Supplementary Fig. 1** The number of patients enrolled in each study center in the Czech Republic and Slovakia

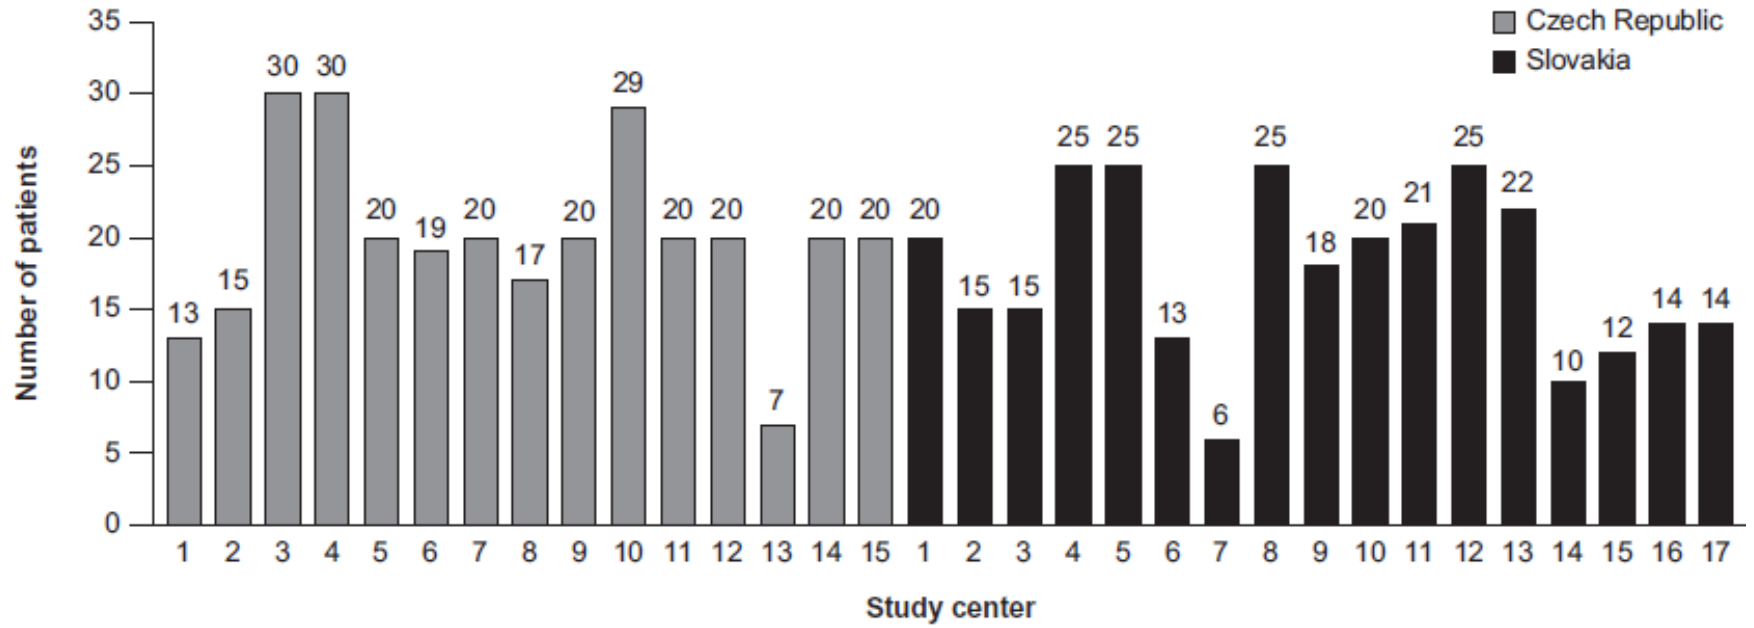

Supplementary Fig. 2 Patient disposition

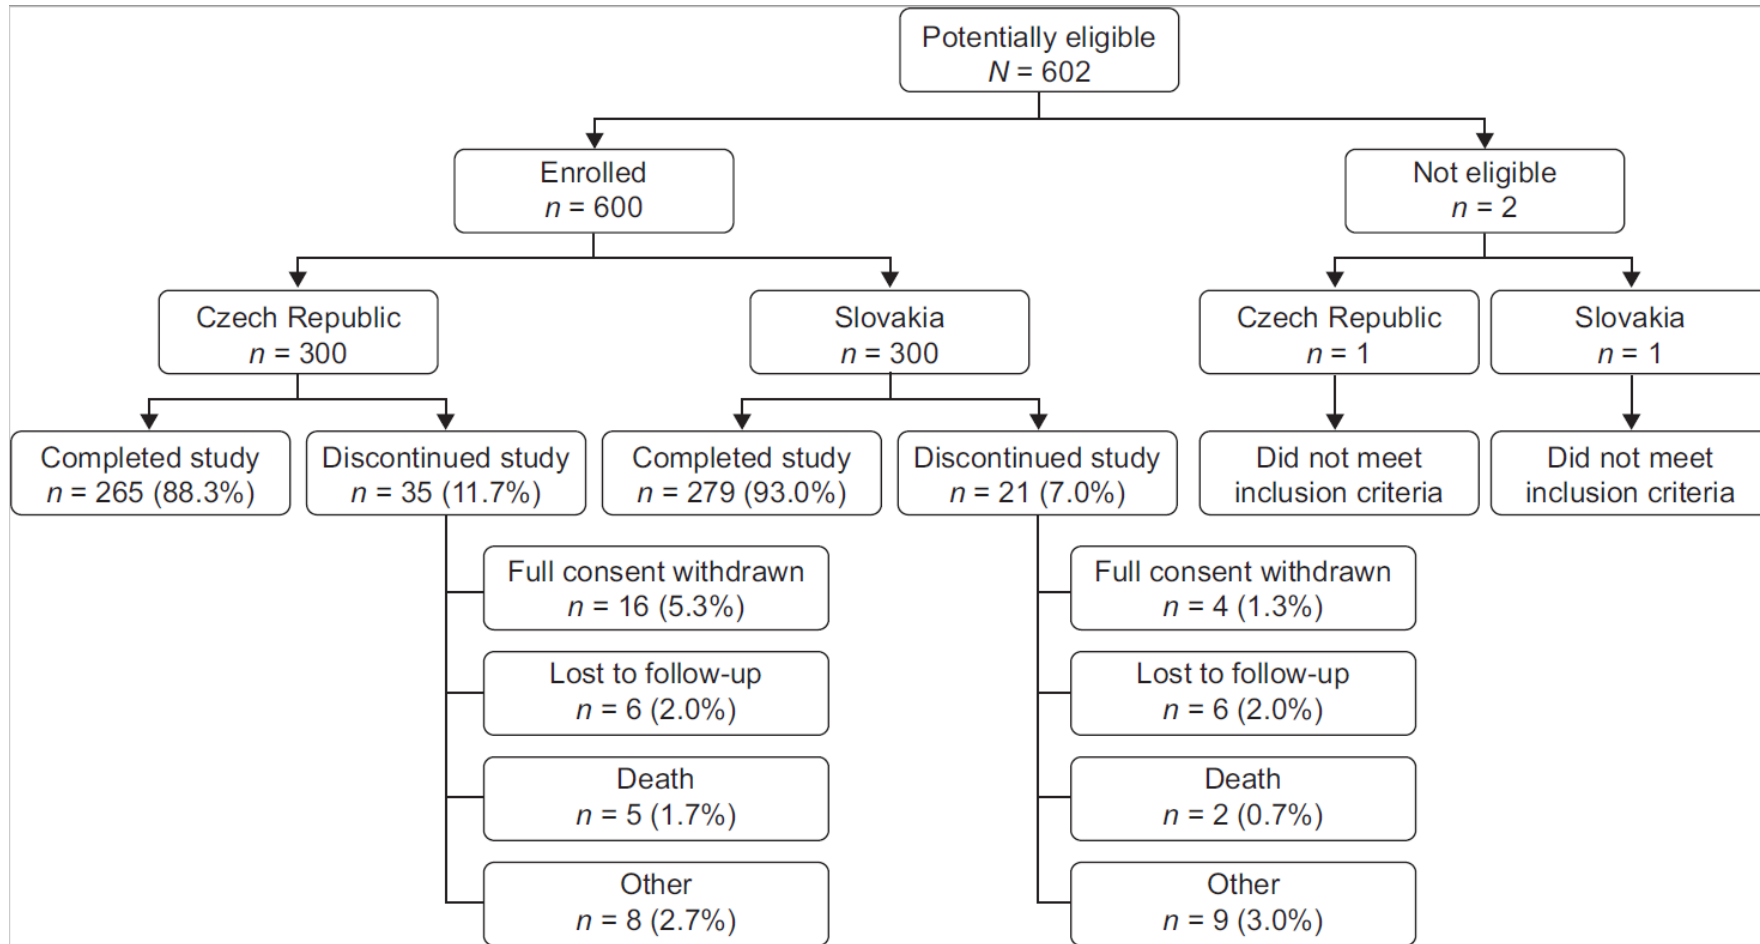

Supplement: 12325_2018_779_MOESM1_ESM.pdf [file 12325_2018_779_MOESM1_ESM.pdf]
